# Supplementary material for: Mixed ligand complexes of silver(i) supported by highly fluorinated pyrazolates, and chelating and bridging N-heterocycles
Source: Royal Society of Chemistry journal article supplement (doi:10.1039/d0nj04007j), 2020-01-01
Supplement: d0nj04007j1.pdf [file d0nj04007j1.pdf]

# **Mixed ligand complexes of silver(I) supported by highly fluorinated pyrazolates, and chelating and bridging *N*-heterocycles**

H. V. Rasika Dias,\* Chammi S. Palehepitiya Gamage, Naleen B. Jayaratna, Champika V. Hettiarachchi

Department of Chemistry and Biochemistry, University of Texas at Arlington, Arlington, Texas 76019,  
United States

## **Supporting information**

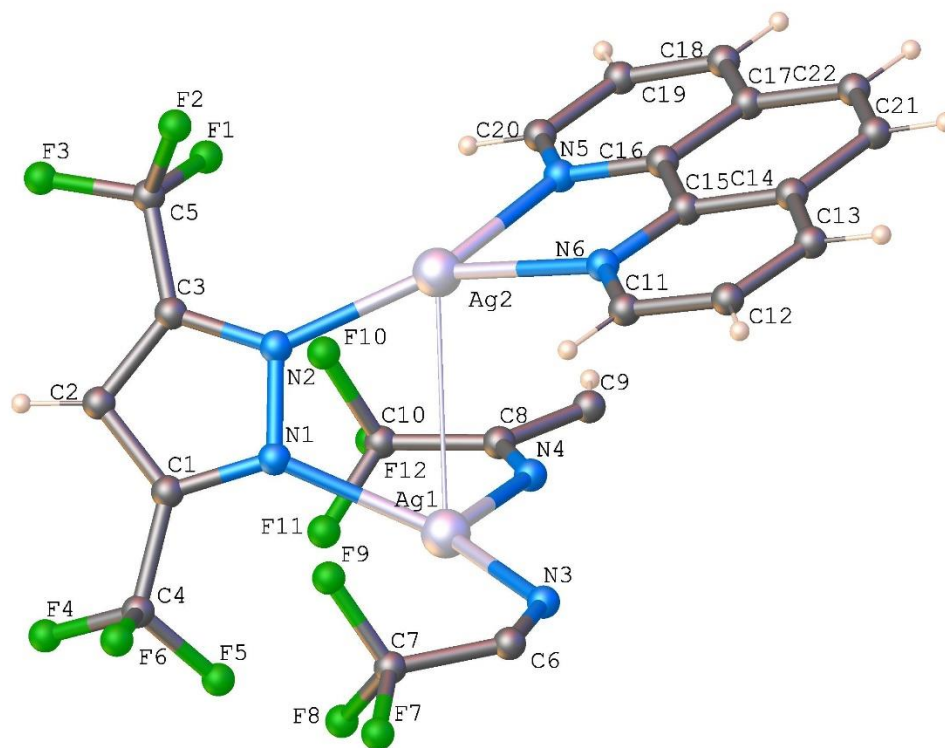

**Figure S1.** Atoms of {[3,5-(CF<sub>3</sub>)<sub>2</sub>Pz]Ag}<sub>4</sub>(1,10-phen)<sub>2</sub> in the asymmetric unit.

**Table S1.** Crystal data and structure refinement for {[3,5-(CF<sub>3</sub>)<sub>2</sub>Pz]Ag}<sub>4</sub>(1,10-phen)<sub>2</sub>.

|                                    |                                                                                 |
|------------------------------------|---------------------------------------------------------------------------------|
| Empirical formula                  | C <sub>44</sub> H <sub>20</sub> Ag <sub>4</sub> F <sub>24</sub> N <sub>12</sub> |
| Formula weight                     | 1604.20                                                                         |
| Temperature/K                      | 100.15                                                                          |
| Crystal system                     | triclinic                                                                       |
| Space group                        | P-1                                                                             |
| a/Å                                | 9.2341(9)                                                                       |
| b/Å                                | 11.7296(11)                                                                     |
| c/Å                                | 11.7828(11)                                                                     |
| α/°                                | 107.2390(10)                                                                    |
| β/°                                | 95.6320(10)                                                                     |
| γ/°                                | 92.7350(10)                                                                     |
| Volume/Å <sup>3</sup>              | 1209.0(2)                                                                       |
| Z                                  | 1                                                                               |
| ρ <sub>calc</sub> /cm <sup>3</sup> | 2.203                                                                           |
| μ/mm <sup>-1</sup>                 | 1.739                                                                           |
| F(000)                             | 772.0                                                                           |
| Crystal size/mm <sup>3</sup>       | 0.1 × 0.08 × 0.03                                                               |
| Radiation                          | MoKα (λ = 0.71073)                                                              |

|                                                  |                                                                    |
|--------------------------------------------------|--------------------------------------------------------------------|
| 2 $\theta$ range for data collection/ $^{\circ}$ | 3.644 to 53.462                                                    |
| Index ranges                                     | $-11 \leq h \leq 11$ , $-14 \leq k \leq 14$ , $-14 \leq l \leq 14$ |
| Reflections collected                            | 10688                                                              |
| Independent reflections                          | 5094 [ $R_{\text{int}} = 0.0214$ , $R_{\text{sigma}} = 0.0307$ ]   |
| Data/restraints/parameters                       | 5094/0/379                                                         |
| Goodness-of-fit on $F^2$                         | 1.027                                                              |
| Final R indexes [ $I \geq 2\sigma(I)$ ]          | $R_1 = 0.0315$ , $wR_2 = 0.0763$                                   |
| Final R indexes [all data]                       | $R_1 = 0.0361$ , $wR_2 = 0.0805$                                   |
| Largest diff. peak/hole / $e \text{ \AA}^{-3}$   | 1.19/-0.65                                                         |

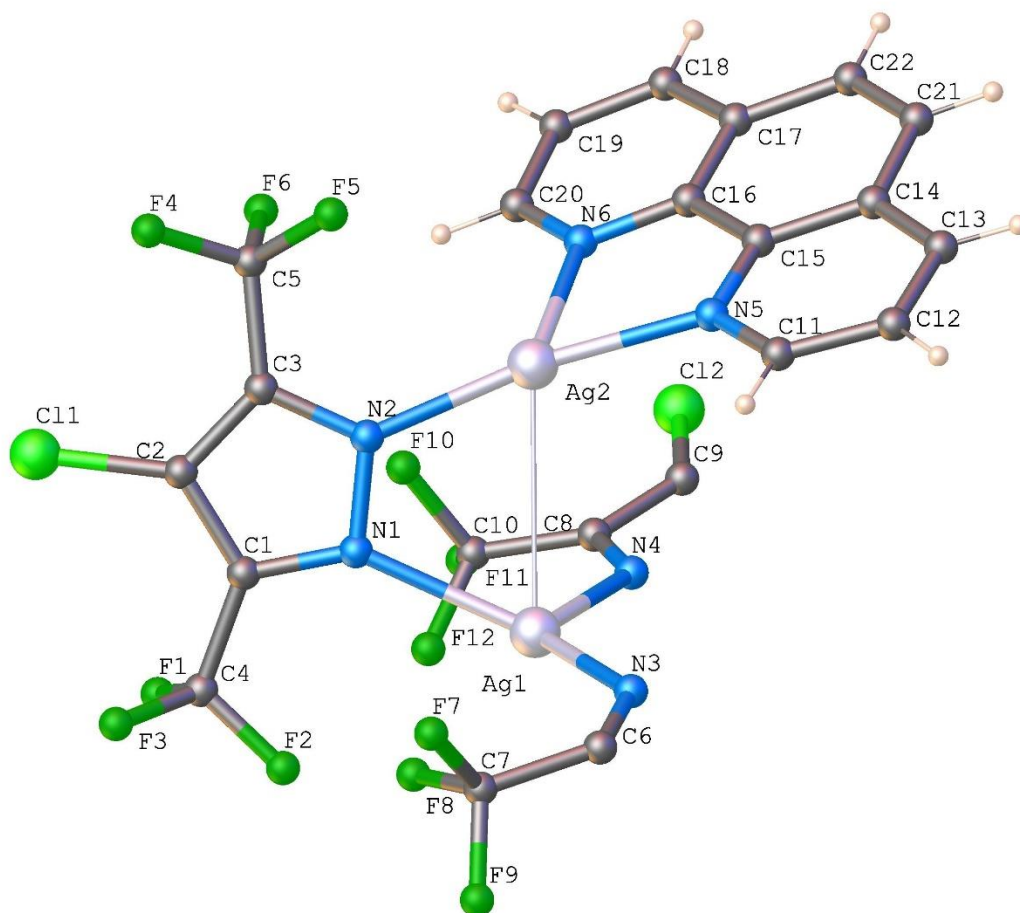

**Figure S2.** Atoms of {[3,5-(CF<sub>3</sub>)<sub>2</sub>Pz]Ag}<sub>4</sub>(1,10-phen)<sub>2</sub> in the asymmetric unit.

**Table S2.** Crystal data and structure refinement for {[4-Cl-3,5-(CF<sub>3</sub>)<sub>2</sub>Pz]Ag}<sub>4</sub>(1,10-phen)<sub>2</sub>.

|                       |                                                                                                 |
|-----------------------|-------------------------------------------------------------------------------------------------|
| Empirical formula     | C <sub>44</sub> H <sub>16</sub> Ag <sub>4</sub> Cl <sub>4</sub> F <sub>24</sub> N <sub>12</sub> |
| Formula weight        | 1741.97                                                                                         |
| Temperature/K         | 100.15                                                                                          |
| Crystal system        | triclinic                                                                                       |
| Space group           | P-1                                                                                             |
| a/Å                   | 11.2824(10)                                                                                     |
| b/Å                   | 11.8130(10)                                                                                     |
| c/Å                   | 11.8889(10)                                                                                     |
| α/°                   | 115.4070(10)                                                                                    |
| β/°                   | 109.1150(10)                                                                                    |
| γ/°                   | 96.3290(10)                                                                                     |
| Volume/Å <sup>3</sup> | 1292.69(19)                                                                                     |
| Z                     | 1                                                                                               |

|                                                |                                                               |
|------------------------------------------------|---------------------------------------------------------------|
| $\rho_{\text{calc}}/\text{cm}^3$               | 2.238                                                         |
| $\mu/\text{mm}^{-1}$                           | 1.836                                                         |
| F(000)                                         | 836.0                                                         |
| Crystal size/ $\text{mm}^3$                    | $0.25 \times 0.2 \times 0.1$                                  |
| Radiation                                      | MoK $\alpha$ ( $\lambda = 0.71073$ )                          |
| $2\theta$ range for data collection/ $^\circ$  | 3.994 to 56.588                                               |
| Index ranges                                   | $-15 \leq h \leq 15, -15 \leq k \leq 15, -15 \leq l \leq 15$  |
| Reflections collected                          | 12785                                                         |
| Independent reflections                        | 6326 [ $R_{\text{int}} = 0.0169, R_{\text{sigma}} = 0.0240$ ] |
| Data/restraints/parameters                     | 6326/0/397                                                    |
| Goodness-of-fit on $F^2$                       | 1.056                                                         |
| Final R indexes [ $I \geq 2\sigma(I)$ ]        | $R_1 = 0.0290, wR_2 = 0.0746$                                 |
| Final R indexes [all data]                     | $R_1 = 0.0314, wR_2 = 0.0770$                                 |
| Largest diff. peak/hole / $e \text{ \AA}^{-3}$ | 1.34/-0.63                                                    |

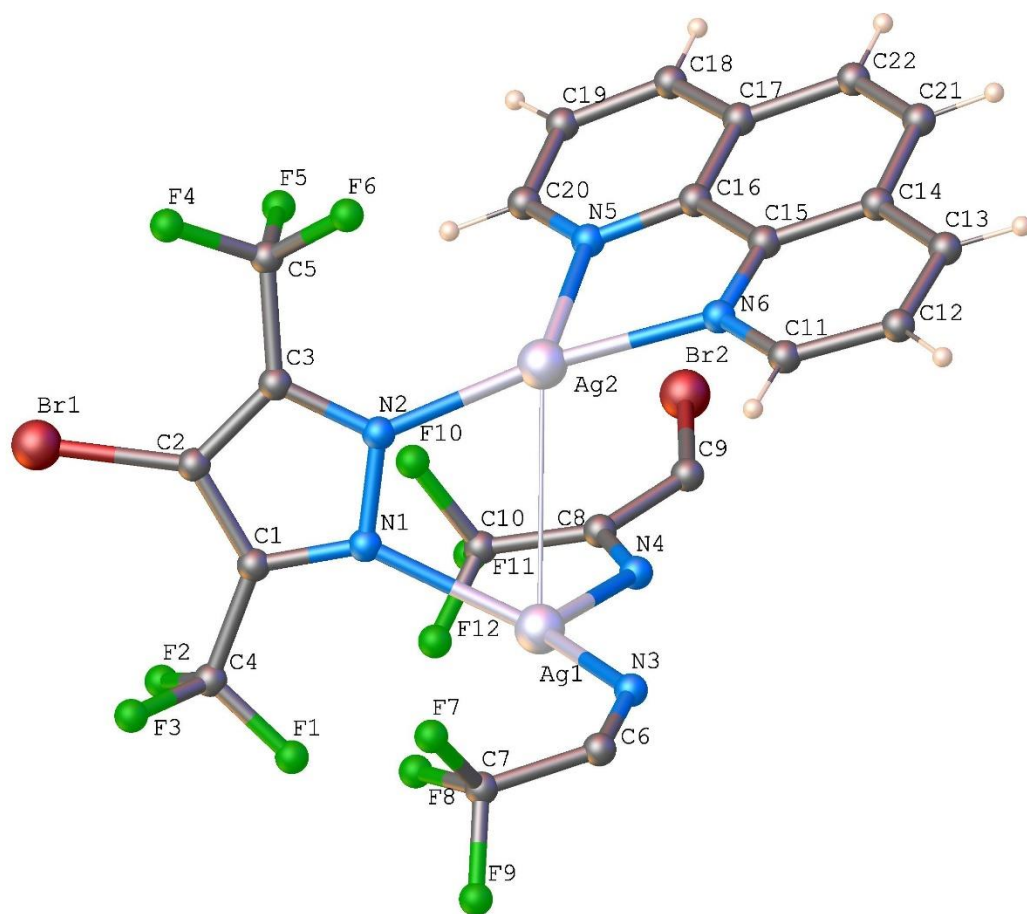

**Figure S3.** Atoms of {[4-Br-3,5-(CF<sub>3</sub>)<sub>2</sub>Pz]Ag}<sub>4</sub>(1,10-phen)<sub>2</sub> in the asymmetric unit.

**Table S3.** Crystal data and structure refinement for {[4-Br-3,5-(CF<sub>3</sub>)<sub>2</sub>Pz]Ag}<sub>4</sub>(1,10-phen)<sub>2</sub>.

|                                    |                                                                                                 |
|------------------------------------|-------------------------------------------------------------------------------------------------|
| Empirical formula                  | C <sub>44</sub> H <sub>16</sub> Ag <sub>4</sub> Br <sub>4</sub> F <sub>24</sub> N <sub>12</sub> |
| Formula weight                     | 1919.81                                                                                         |
| Temperature/K                      | 100.15                                                                                          |
| Crystal system                     | triclinic                                                                                       |
| Space group                        | P-1                                                                                             |
| a/Å                                | 11.344(2)                                                                                       |
| b/Å                                | 11.818(2)                                                                                       |
| c/Å                                | 11.899(2)                                                                                       |
| α/°                                | 114.407(2)                                                                                      |
| β/°                                | 108.836(2)                                                                                      |
| γ/°                                | 96.696(2)                                                                                       |
| Volume/Å <sup>3</sup>              | 1315.7(4)                                                                                       |
| Z                                  | 1                                                                                               |
| ρ <sub>calc</sub> /cm <sup>3</sup> | 2.423                                                                                           |
| μ/mm <sup>-1</sup>                 | 4.639                                                                                           |
| F(000)                             | 908.0                                                                                           |

|                                                  |                                                                        |
|--------------------------------------------------|------------------------------------------------------------------------|
| Crystal size/mm <sup>3</sup>                     | 0.2 × 0.15 × 0.05                                                      |
| Radiation                                        | MoK $\alpha$ ( $\lambda = 0.71073$ )                                   |
| 2 $\Theta$ range for data collection/ $^{\circ}$ | 3.954 to 52.74                                                         |
| Index ranges                                     | -14 $\leq$ h $\leq$ 14, -14 $\leq$ k $\leq$ 14, -14 $\leq$ l $\leq$ 14 |
| Reflections collected                            | 11283                                                                  |
| Independent reflections                          | 5329 [ $R_{\text{int}} = 0.0267$ , $R_{\text{sigma}} = 0.0339$ ]       |
| Data/restraints/parameters                       | 5329/0/397                                                             |
| Goodness-of-fit on F <sup>2</sup>                | 1.065                                                                  |
| Final R indexes [ $I \geq 2\sigma(I)$ ]          | $R_1 = 0.0378$ , $wR_2 = 0.1028$                                       |
| Final R indexes [all data]                       | $R_1 = 0.0408$ , $wR_2 = 0.1057$                                       |
| Largest diff. peak/hole / e $\text{\AA}^{-3}$    | 2.56/-1.48                                                             |

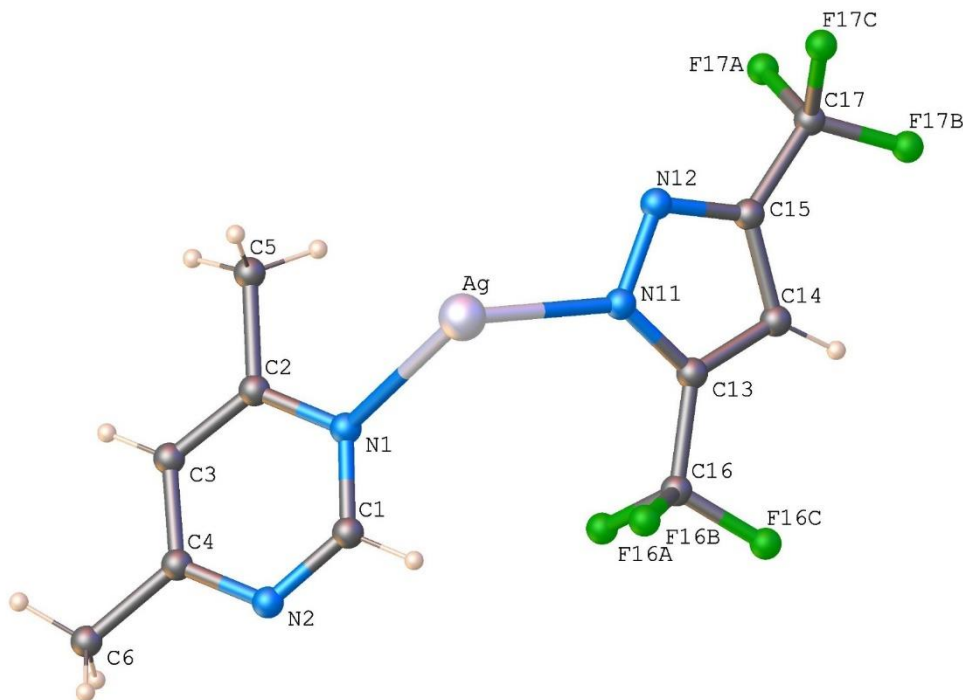

**Figure S4.** Atoms of {[3,5-(CF<sub>3</sub>)<sub>2</sub>Pz]Ag(4,6-Me<sub>2</sub>-pyrm)}<sub>∞</sub> in the asymmetric unit.

**Table S4.** Crystal data and structure refinement for {[3,5-(CF<sub>3</sub>)<sub>2</sub>Pz]Ag(4,6-Me<sub>2</sub>-pyrm)}<sub>∞</sub>.

|                                    |                                                                                |
|------------------------------------|--------------------------------------------------------------------------------|
| Empirical formula                  | C <sub>22</sub> H <sub>18</sub> Ag <sub>2</sub> F <sub>12</sub> N <sub>8</sub> |
| Formula weight                     | 838.18                                                                         |
| Temperature/K                      | 100.15                                                                         |
| Crystal system                     | triclinic                                                                      |
| Space group                        | P-1                                                                            |
| a/Å                                | 7.9948(16)                                                                     |
| b/Å                                | 9.2604(19)                                                                     |
| c/Å                                | 10.149(2)                                                                      |
| α/°                                | 95.903(3)                                                                      |
| β/°                                | 99.779(3)                                                                      |
| γ/°                                | 113.145(2)                                                                     |
| Volume/Å <sup>3</sup>              | 668.9(2)                                                                       |
| Z                                  | 1                                                                              |
| ρ <sub>calc</sub> /cm <sup>3</sup> | 2.081                                                                          |
| μ/mm <sup>-1</sup>                 | 1.579                                                                          |
| F(000)                             | 408.0                                                                          |
| Crystal size/mm <sup>3</sup>       | 0.29 × 0.12 × 0.04                                                             |
| Radiation                          | MoKα (λ = 0.71073)                                                             |



|                                                  |                                                               |
|--------------------------------------------------|---------------------------------------------------------------|
| 2 $\Theta$ range for data collection/ $^{\circ}$ | 4.146 to 56.56                                                |
| Index ranges                                     | $-10 \leq h \leq 10, -11 \leq k \leq 12, -13 \leq l \leq 13$  |
| Reflections collected                            | 6216                                                          |
| Independent reflections                          | 3176 [ $R_{\text{int}} = 0.0154, R_{\text{sigma}} = 0.0206$ ] |
| Data/restraints/parameters                       | 3176/0/201                                                    |
| Goodness-of-fit on $F^2$                         | 1.036                                                         |
| Final R indexes [ $I \geq 2\sigma(I)$ ]          | $R_1 = 0.0218, wR_2 = 0.0561$                                 |
| Final R indexes [all data]                       | $R_1 = 0.0226, wR_2 = 0.0568$                                 |
| Largest diff. peak/hole / $e \text{ \AA}^{-3}$   | 0.99/-0.68                                                    |

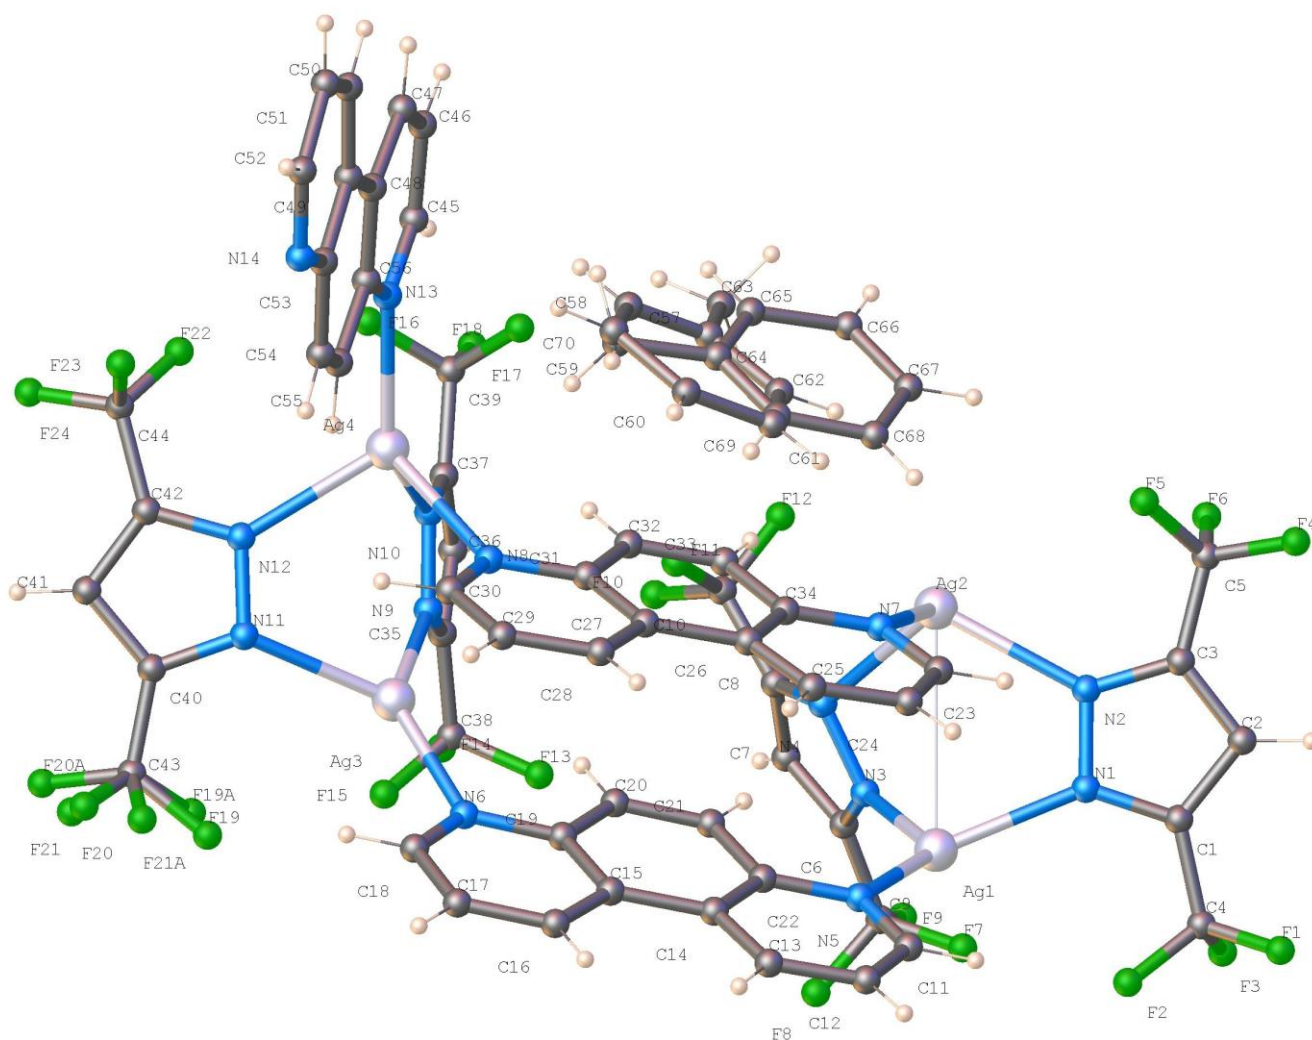

**Figure S5.** Atom labelling scheme of  $\{[3,5-(\text{CF}_3)_2\text{Pz}]_4\text{Ag}_4(4,7\text{-phen})_3\}_\infty$  in the asymmetric unit.

**Table S5.** Crystal data and structure refinement for  $\{[3,5-(\text{CF}_3)_2\text{Pz}]_4\text{Ag}_4(4,7\text{-phen})_3\}_\infty$ .

|                     |                                                                   |
|---------------------|-------------------------------------------------------------------|
| Identification code | dias46s                                                           |
| Empirical formula   | $\text{C}_{63}\text{H}_{36}\text{Ag}_4\text{F}_{24}\text{N}_{14}$ |
| Formula weight      | 1876.54                                                           |
| Temperature/K       | 100.15                                                            |
| Crystal system      | triclinic                                                         |
| Space group         | P-1                                                               |
| a/Å                 | 12.1451(13)                                                       |
| b/Å                 | 13.5207(14)                                                       |
| c/Å                 | 20.327(3)                                                         |

|                                                |                                                                |
|------------------------------------------------|----------------------------------------------------------------|
| $\alpha/^\circ$                                | 92.125(5)                                                      |
| $\beta/^\circ$                                 | 96.546(6)                                                      |
| $\gamma/^\circ$                                | 103.553(11)                                                    |
| Volume/ $\text{\AA}^3$                         | 3216.8(7)                                                      |
| Z                                              | 2                                                              |
| $\rho_{\text{calc}}/\text{cm}^3$               | 1.937                                                          |
| $\mu/\text{mm}^{-1}$                           | 1.324                                                          |
| F(000)                                         | 1832.0                                                         |
| Crystal size/ $\text{mm}^3$                    | $0.26 \times 0.15 \times 0.09$                                 |
| Radiation                                      | MoK $\alpha$ ( $\lambda = 0.71073$ )                           |
| 2 $\Theta$ range for data collection/ $^\circ$ | 3.478 to 56.55                                                 |
| Index ranges                                   | $-16 \leq h \leq 15, -17 \leq k \leq 17, -27 \leq l \leq 26$   |
| Reflections collected                          | 30094                                                          |
| Independent reflections                        | 15308 [ $R_{\text{int}} = 0.0293, R_{\text{sigma}} = 0.0445$ ] |
| Data/restraints/parameters                     | 15308/15/1038                                                  |
| Goodness-of-fit on $F^2$                       | 1.046                                                          |
| Final R indexes [ $I \geq 2\sigma(I)$ ]        | $R_1 = 0.0385, wR_2 = 0.0904$                                  |
| Final R indexes [all data]                     | $R_1 = 0.0497, wR_2 = 0.0973$                                  |
| Largest diff. peak/hole / $e \text{\AA}^{-3}$  | 1.38/-0.65                                                     |

**Table S6. Bond Lengths for  $\{[3,5-(\text{CF}_3)_2\text{Pz}]_4\text{Ag}_4(4,7\text{-phen})_3\}_\infty$ .**

| Atom | Atom             | Length/ $\text{\AA}$ | Atom | Atom | Length/ $\text{\AA}$ |
|------|------------------|----------------------|------|------|----------------------|
| Ag1  | Ag2              | 3.3345 (6)           | C1   | C2   | 1.387 (4)            |
| Ag1  | N1               | 2.225 (2)            | C1   | C4   | 1.482 (4)            |
| Ag1  | N3               | 2.258 (3)            | C2   | C3   | 1.376 (4)            |
| Ag1  | N5               | 2.220 (3)            | C3   | C5   | 1.484 (5)            |
| Ag2  | N2               | 2.354 (3)            | C6   | C7   | 1.390 (5)            |
| Ag2  | N4               | 2.439 (3)            | C6   | C9   | 1.478 (5)            |
| Ag2  | N7               | 2.325 (3)            | C7   | C8   | 1.382 (5)            |
| Ag2  | N14 <sup>1</sup> | 2.315 (3)            | C8   | C10  | 1.470 (5)            |
| Ag3  | N6               | 2.235 (3)            | C11  | C12  | 1.390 (5)            |
| Ag3  | N9               | 2.235 (3)            | C12  | C13  | 1.368 (5)            |
| Ag3  | N11              | 2.287 (2)            | C13  | C14  | 1.406 (4)            |
| Ag4  | N8               | 2.502 (3)            | C14  | C15  | 1.452 (4)            |
| Ag4  | N10              | 2.279 (3)            | C14  | C22  | 1.409 (4)            |
| Ag4  | N12              | 2.355 (3)            | C15  | C16  | 1.407 (4)            |
| Ag4  | N13              | 2.277 (3)            | C15  | C19  | 1.417 (4)            |
| F1   | C4               | 1.342 (3)            | C16  | C17  | 1.369 (5)            |
| F2   | C4               | 1.336 (4)            | C17  | C18  | 1.397 (5)            |
| F3   | C4               | 1.359 (4)            | C19  | C20  | 1.427 (4)            |
| F4   | C5               | 1.340 (4)            | C20  | C21  | 1.351 (4)            |
| F5   | C5               | 1.337 (4)            | C21  | C22  | 1.436 (4)            |
| F6   | C5               | 1.346 (4)            | C23  | C24  | 1.396 (4)            |

|      |     |           |     |     |            |
|------|-----|-----------|-----|-----|------------|
| F7   | C9  | 1.355 (4) | C24 | C25 | 1.377 (4)  |
| F8   | C9  | 1.343 (4) | C25 | C26 | 1.401 (4)  |
| F9   | C9  | 1.330 (4) | C26 | C27 | 1.459 (4)  |
| F10  | C10 | 1.327 (4) | C26 | C34 | 1.411 (4)  |
| F11  | C10 | 1.339 (5) | C27 | C28 | 1.400 (4)  |
| F12  | C10 | 1.332 (5) | C27 | C31 | 1.418 (4)  |
| F13  | C38 | 1.351 (4) | C28 | C29 | 1.370 (4)  |
| F14  | C38 | 1.344 (4) | C29 | C30 | 1.394 (4)  |
| F15  | C38 | 1.350 (5) | C31 | C32 | 1.427 (4)  |
| F16  | C39 | 1.353 (5) | C32 | C33 | 1.359 (4)  |
| F17  | C39 | 1.325 (4) | C33 | C34 | 1.428 (4)  |
| F18  | C39 | 1.356 (4) | C35 | C36 | 1.383 (5)  |
| F22  | C44 | 1.341 (4) | C35 | C38 | 1.467 (6)  |
| F23  | C44 | 1.343 (4) | C36 | C37 | 1.383 (5)  |
| F24  | C44 | 1.344 (4) | C37 | C39 | 1.464 (6)  |
| F19  | C43 | 1.347 (6) | C40 | C41 | 1.391 (5)  |
| F20  | C43 | 1.311 (6) | C40 | C43 | 1.465 (5)  |
| F21  | C43 | 1.367 (6) | C41 | C42 | 1.366 (5)  |
| F19A | C43 | 1.357 (4) | C42 | C44 | 1.483 (5)  |
| F20A | C43 | 1.329 (5) | C45 | C46 | 1.398 (5)  |
| F21A | C43 | 1.283 (5) | C46 | C47 | 1.369 (5)  |
| N1   | N2  | 1.356 (4) | C47 | C48 | 1.405 (4)  |
| N1   | C1  | 1.341 (4) | C48 | C49 | 1.461 (5)  |
| N2   | C3  | 1.346 (4) | C48 | C56 | 1.411 (5)  |
| N3   | N4  | 1.360 (4) | C49 | C50 | 1.405 (5)  |
| N3   | C6  | 1.337 (4) | C49 | C53 | 1.415 (4)  |
| N4   | C8  | 1.349 (4) | C50 | C51 | 1.366 (5)  |
| N5   | C11 | 1.331 (4) | C51 | C52 | 1.399 (5)  |
| N5   | C22 | 1.371 (4) | C53 | C54 | 1.424 (5)  |
| N6   | C18 | 1.330 (4) | C54 | C55 | 1.349 (5)  |
| N6   | C19 | 1.377 (4) | C55 | C56 | 1.424 (4)  |
| N7   | C23 | 1.328 (4) | C64 | C65 | 1.347 (12) |
| N7   | C34 | 1.369 (4) | C64 | C69 | 1.30 (3)   |
| N8   | C30 | 1.319 (4) | C64 | C70 | 1.47 (2)   |
| N8   | C31 | 1.371 (4) | C65 | C66 | 1.424 (13) |
| N9   | N10 | 1.344 (4) | C66 | C67 | 1.375 (11) |
| N9   | C35 | 1.340 (4) | C67 | C68 | 1.375 (10) |
| N10  | C37 | 1.348 (4) | C68 | C69 | 1.40 (3)   |
| N11  | N12 | 1.350 (4) | C57 | C58 | 1.382 (13) |
| N11  | C40 | 1.346 (4) | C57 | C62 | 1.397 (12) |
| N12  | C42 | 1.349 (4) | C57 | C63 | 1.504 (12) |
| N13  | C45 | 1.326 (4) | C58 | C59 | 1.38 (2)   |
| N13  | C56 | 1.377 (4) | C59 | C60 | 1.44 (2)   |
| N14  | C52 | 1.328 (4) | C60 | C61 | 1.39 (3)   |

N14 C53 1.366(4) C61 C62 1.49(2)

<sup>1</sup>+X,-1+Y,+Z

**Table S7. Bond Angles for {[3,5-(CF<sub>3</sub>)<sub>2</sub>Pz]<sub>4</sub>Ag<sub>4</sub>(4,7-phen)<sub>3</sub>}<sub>∞</sub>.**

| Atom             | Atom | Atom | Angle/°    | Atom | Atom | Atom | Angle/°  |
|------------------|------|------|------------|------|------|------|----------|
| N1               | Ag1  | Ag2  | 67.34(7)   | C19  | C15  | C14  | 118.7(3) |
| N1               | Ag1  | N3   | 101.61(9)  | C17  | C16  | C15  | 119.6(3) |
| N3               | Ag1  | Ag2  | 64.18(7)   | C16  | C17  | C18  | 119.5(3) |
| N5               | Ag1  | Ag2  | 112.26(6)  | N6   | C18  | C17  | 123.1(3) |
| N5               | Ag1  | N1   | 127.66(9)  | N6   | C19  | C15  | 121.7(3) |
| N5               | Ag1  | N3   | 126.11(9)  | N6   | C19  | C20  | 118.2(3) |
| N2               | Ag2  | Ag1  | 61.21(7)   | C15  | C19  | C20  | 120.1(3) |
| N2               | Ag2  | N4   | 110.79(9)  | C21  | C20  | C19  | 121.3(3) |
| N4               | Ag2  | Ag1  | 61.68(7)   | C20  | C21  | C22  | 120.4(3) |
| N7               | Ag2  | Ag1  | 77.92(6)   | N5   | C22  | C14  | 122.1(3) |
| N7               | Ag2  | N2   | 98.41(9)   | N5   | C22  | C21  | 117.7(3) |
| N7               | Ag2  | N4   | 104.62(9)  | C14  | C22  | C21  | 120.2(3) |
| N14 <sup>1</sup> | Ag2  | Ag1  | 150.09(7)  | N7   | C23  | C24  | 123.4(3) |
| N14 <sup>1</sup> | Ag2  | N2   | 104.04(9)  | C25  | C24  | C23  | 118.8(3) |
| N14 <sup>1</sup> | Ag2  | N4   | 106.31(9)  | C24  | C25  | C26  | 119.8(3) |
| N14 <sup>1</sup> | Ag2  | N7   | 131.72(9)  | C25  | C26  | C27  | 123.7(3) |
| N6               | Ag3  | N11  | 122.13(9)  | C25  | C26  | C34  | 117.6(3) |
| N9               | Ag3  | N6   | 138.60(9)  | C34  | C26  | C27  | 118.7(3) |
| N9               | Ag3  | N11  | 99.20(9)   | C28  | C27  | C26  | 123.5(3) |
| N10              | Ag4  | N8   | 97.95(9)   | C28  | C27  | C31  | 117.6(3) |
| N10              | Ag4  | N12  | 95.51(10)  | C31  | C27  | C26  | 118.9(3) |
| N12              | Ag4  | N8   | 96.17(9)   | C29  | C28  | C27  | 120.0(3) |
| N13              | Ag4  | N8   | 109.48(9)  | C28  | C29  | C30  | 118.5(3) |
| N13              | Ag4  | N10  | 134.59(10) | N8   | C30  | C29  | 124.1(3) |
| N13              | Ag4  | N12  | 115.90(10) | N8   | C31  | C27  | 121.7(3) |
| N2               | N1   | Ag1  | 112.48(18) | N8   | C31  | C32  | 118.0(3) |
| C1               | N1   | Ag1  | 138.8(2)   | C27  | C31  | C32  | 120.2(3) |
| C1               | N1   | N2   | 108.1(2)   | C33  | C32  | C31  | 120.8(3) |
| N1               | N2   | Ag2  | 117.77(18) | C32  | C33  | C34  | 120.9(3) |
| C3               | N2   | Ag2  | 135.0(2)   | N7   | C34  | C26  | 122.3(3) |
| C3               | N2   | N1   | 107.0(2)   | N7   | C34  | C33  | 117.2(3) |
| N4               | N3   | Ag1  | 113.06(19) | C26  | C34  | C33  | 120.5(3) |
| C6               | N3   | Ag1  | 138.2(2)   | N9   | C35  | C36  | 110.8(3) |
| C6               | N3   | N4   | 108.4(3)   | N9   | C35  | C38  | 119.9(3) |
| N3               | N4   | Ag2  | 106.31(17) | C36  | C35  | C38  | 129.1(3) |
| C8               | N4   | Ag2  | 131.9(2)   | C37  | C36  | C35  | 102.6(3) |

|     |     |                  |             |      |     |      |           |
|-----|-----|------------------|-------------|------|-----|------|-----------|
| C8  | N4  | N3               | 106.6 (3)   | N10  | C37 | C36  | 111.2 (4) |
| C11 | N5  | Ag1              | 119.4 (2)   | N10  | C37 | C39  | 119.6 (3) |
| C11 | N5  | C22              | 118.0 (3)   | C36  | C37 | C39  | 129.2 (3) |
| C22 | N5  | Ag1              | 122.65 (19) | F13  | C38 | C35  | 112.9 (3) |
| C18 | N6  | Ag3              | 117.6 (2)   | F14  | C38 | F13  | 106.0 (3) |
| C18 | N6  | C19              | 118.3 (3)   | F14  | C38 | F15  | 106.2 (3) |
| C19 | N6  | Ag3              | 122.7 (2)   | F14  | C38 | C35  | 112.1 (3) |
| C23 | N7  | Ag2              | 117.9 (2)   | F15  | C38 | F13  | 105.8 (3) |
| C23 | N7  | C34              | 118.0 (3)   | F15  | C38 | C35  | 113.2 (3) |
| C34 | N7  | Ag2              | 123.13 (19) | F16  | C39 | F18  | 103.5 (3) |
| C30 | N8  | Ag4              | 117.26 (19) | F16  | C39 | C37  | 113.9 (3) |
| C30 | N8  | C31              | 117.9 (3)   | F17  | C39 | F16  | 107.0 (4) |
| C31 | N8  | Ag4              | 123.8 (2)   | F17  | C39 | F18  | 106.1 (3) |
| N10 | N9  | Ag3              | 119.1 (2)   | F17  | C39 | C37  | 112.8 (4) |
| C35 | N9  | Ag3              | 132.4 (3)   | F18  | C39 | C37  | 112.8 (3) |
| C35 | N9  | N10              | 108.3 (3)   | N11  | C40 | C41  | 110.2 (3) |
| N9  | N10 | Ag4              | 116.8 (2)   | N11  | C40 | C43  | 120.5 (3) |
| N9  | N10 | C37              | 107.1 (3)   | C41  | C40 | C43  | 129.3 (3) |
| C37 | N10 | Ag4              | 135.6 (3)   | C42  | C41 | C40  | 103.4 (3) |
| N12 | N11 | Ag3              | 114.65 (19) | N12  | C42 | C41  | 111.3 (3) |
| C40 | N11 | Ag3              | 134.4 (2)   | N12  | C42 | C44  | 119.8 (3) |
| C40 | N11 | N12              | 107.9 (3)   | C41  | C42 | C44  | 128.9 (3) |
| N11 | N12 | Ag4              | 119.11 (19) | F19  | C43 | F21  | 94.3 (7)  |
| C42 | N12 | Ag4              | 132.6 (2)   | F19  | C43 | C40  | 117.9 (4) |
| C42 | N12 | N11              | 107.2 (3)   | F20  | C43 | F19  | 107.6 (7) |
| C45 | N13 | Ag4              | 120.9 (2)   | F20  | C43 | F21  | 96.3 (7)  |
| C45 | N13 | C56              | 117.7 (3)   | F20  | C43 | C40  | 122.6 (5) |
| C56 | N13 | Ag4              | 121.3 (2)   | F21  | C43 | C40  | 112.4 (5) |
| C52 | N14 | Ag2 <sup>2</sup> | 119.5 (2)   | F19A | C43 | C40  | 107.6 (3) |
| C52 | N14 | C53              | 118.0 (3)   | F20A | C43 | F19A | 105.1 (4) |
| C53 | N14 | Ag2 <sup>2</sup> | 122.4 (2)   | F20A | C43 | C40  | 106.7 (4) |
| N1  | C1  | C2               | 110.4 (3)   | F21A | C43 | F19A | 109.8 (4) |
| N1  | C1  | C4               | 120.3 (3)   | F21A | C43 | F20A | 111.9 (5) |
| C2  | C1  | C4               | 129.2 (3)   | F21A | C43 | C40  | 115.2 (4) |
| C3  | C2  | C1               | 103.3 (3)   | F22  | C44 | F23  | 105.8 (3) |
| N2  | C3  | C2               | 111.2 (3)   | F22  | C44 | F24  | 106.2 (3) |
| N2  | C3  | C5               | 120.4 (3)   | F22  | C44 | C42  | 113.1 (3) |
| C2  | C3  | C5               | 128.4 (3)   | F23  | C44 | F24  | 106.0 (3) |
| F1  | C4  | F3               | 104.9 (2)   | F23  | C44 | C42  | 113.8 (3) |
| F1  | C4  | C1               | 112.5 (3)   | F24  | C44 | C42  | 111.3 (3) |
| F2  | C4  | F1               | 107.5 (3)   | N13  | C45 | C46  | 123.3 (3) |
| F2  | C4  | F3               | 105.5 (3)   | C47  | C46 | C45  | 119.6 (3) |
| F2  | C4  | C1               | 113.4 (3)   | C46  | C47 | C48  | 119.3 (3) |
| F3  | C4  | C1               | 112.5 (3)   | C47  | C48 | C49  | 123.2 (3) |

|     |     |     |           |     |     |     |            |
|-----|-----|-----|-----------|-----|-----|-----|------------|
| F4  | C5  | F6  | 106.3 (3) | C47 | C48 | C56 | 117.8 (3)  |
| F4  | C5  | C3  | 111.4 (3) | C56 | C48 | C49 | 119.0 (3)  |
| F5  | C5  | F4  | 107.2 (3) | C50 | C49 | C48 | 123.0 (3)  |
| F5  | C5  | F6  | 105.6 (3) | C50 | C49 | C53 | 118.1 (3)  |
| F5  | C5  | C3  | 113.4 (3) | C53 | C49 | C48 | 118.9 (3)  |
| F6  | C5  | C3  | 112.4 (3) | C51 | C50 | C49 | 119.3 (3)  |
| N3  | C6  | C7  | 110.7 (3) | C50 | C51 | C52 | 119.3 (3)  |
| N3  | C6  | C9  | 121.3 (3) | N14 | C52 | C51 | 123.4 (3)  |
| C7  | C6  | C9  | 128.0 (3) | N14 | C53 | C49 | 121.9 (3)  |
| C8  | C7  | C6  | 102.8 (3) | N14 | C53 | C54 | 118.4 (3)  |
| N4  | C8  | C7  | 111.5 (3) | C49 | C53 | C54 | 119.7 (3)  |
| N4  | C8  | C10 | 120.4 (3) | C55 | C54 | C53 | 121.2 (3)  |
| C7  | C8  | C10 | 128.0 (3) | C54 | C55 | C56 | 121.3 (3)  |
| F7  | C9  | C6  | 112.1 (3) | N13 | C56 | C48 | 122.3 (3)  |
| F8  | C9  | F7  | 105.8 (3) | N13 | C56 | C55 | 117.9 (3)  |
| F8  | C9  | C6  | 113.3 (3) | C48 | C56 | C55 | 119.8 (3)  |
| F9  | C9  | F7  | 105.8 (3) | C65 | C64 | C70 | 121.9 (13) |
| F9  | C9  | F8  | 107.1 (3) | C69 | C64 | C65 | 116.4 (12) |
| F9  | C9  | C6  | 112.2 (3) | C69 | C64 | C70 | 121.6 (16) |
| F10 | C10 | F11 | 106.3 (3) | C64 | C65 | C66 | 121.7 (9)  |
| F10 | C10 | F12 | 105.6 (3) | C67 | C66 | C65 | 118.7 (8)  |
| F10 | C10 | C8  | 112.5 (3) | C66 | C67 | C68 | 120.2 (7)  |
| F11 | C10 | C8  | 113.3 (3) | C67 | C68 | C69 | 115.6 (11) |
| F12 | C10 | F11 | 105.8 (4) | C64 | C69 | C68 | 127.3 (17) |
| F12 | C10 | C8  | 112.8 (3) | C58 | C57 | C62 | 117.7 (8)  |
| N5  | C11 | C12 | 123.2 (3) | C58 | C57 | C63 | 121.3 (8)  |
| C13 | C12 | C11 | 119.4 (3) | C62 | C57 | C63 | 121.0 (9)  |
| C12 | C13 | C14 | 119.5 (3) | C59 | C58 | C57 | 123.8 (11) |
| C13 | C14 | C15 | 123.1 (3) | C58 | C59 | C60 | 116.9 (13) |
| C13 | C14 | C22 | 117.7 (3) | C61 | C60 | C59 | 125.2 (14) |
| C22 | C14 | C15 | 119.2 (3) | C60 | C61 | C62 | 113 (2)    |
| C16 | C15 | C14 | 123.5 (3) | C57 | C62 | C61 | 123.6 (15) |
| C16 | C15 | C19 | 117.8 (3) |     |     |     |            |

<sup>1</sup>+X,-1+Y,+Z; <sup>2</sup>+X,1+Y,+Z

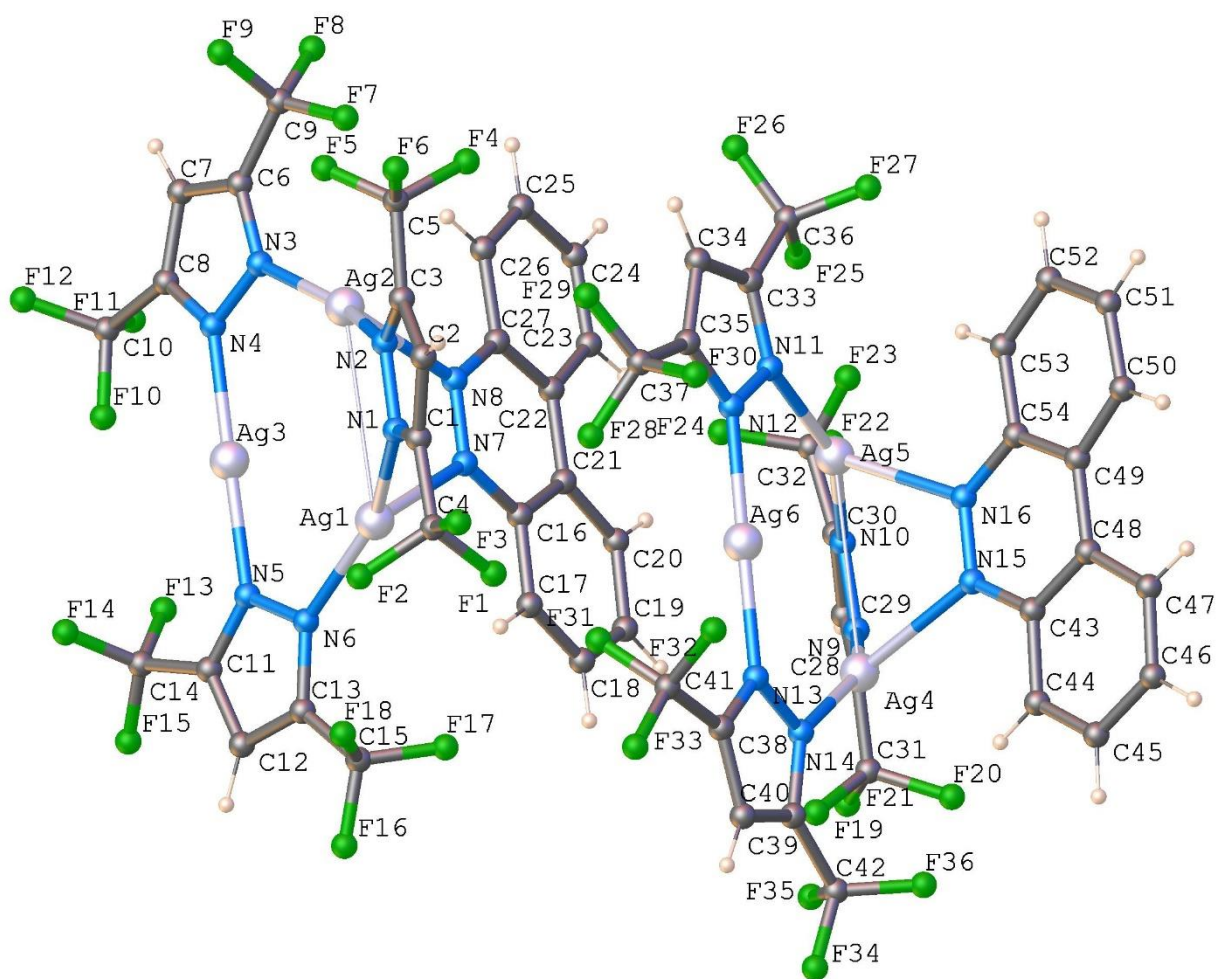

**Figure S6.** Atoms of {[3,5-(CF<sub>3</sub>)<sub>2</sub>Pz]Ag}<sub>3</sub>(benzo[*c*]cinnoline) in the asymmetric unit.

**Table S8.** Crystal data and structure refinement for {[3,5-(CF<sub>3</sub>)<sub>2</sub>Pz]Ag}<sub>3</sub>(benzo[*c*]cinnoline).

|                   |                                                                                |
|-------------------|--------------------------------------------------------------------------------|
| Empirical formula | C <sub>27</sub> H <sub>11</sub> Ag <sub>3</sub> F <sub>18</sub> N <sub>8</sub> |
| Formula weight    | 1113.05                                                                        |
| Temperature/K     | 100                                                                            |
| Crystal system    | triclinic                                                                      |
| Space group       | P1                                                                             |
| a/Å               | 9.771(3)                                                                       |
| b/Å               | 12.915(5)                                                                      |
| c/Å               | 15.031(5)                                                                      |



|                                               |                                                                |
|-----------------------------------------------|----------------------------------------------------------------|
| $\alpha/^\circ$                               | 113.919(3)                                                     |
| $\beta/^\circ$                                | 91.759(4)                                                      |
| $\gamma/^\circ$                               | 107.231(4)                                                     |
| Volume/ $\text{\AA}^3$                        | 1631.3(10)                                                     |
| Z                                             | 2                                                              |
| $\rho_{\text{calc}}/\text{g/cm}^3$            | 2.266                                                          |
| $\mu/\text{mm}^{-1}$                          | 1.923                                                          |
| F(000)                                        | 1064.0                                                         |
| Crystal size/ $\text{mm}^3$                   | $0.27 \times 0.24 \times 0.23$                                 |
| Radiation                                     | MoK $\alpha$ ( $\lambda = 0.71073$ )                           |
| $2\Theta$ range for data collection/ $^\circ$ | 3.01 to 56.592                                                 |
| Index ranges                                  | $-12 \leq h \leq 12, -17 \leq k \leq 17, -19 \leq l \leq 19$   |
| Reflections collected                         | 15085                                                          |
| Independent reflections                       | 13595 [ $R_{\text{int}} = 0.0307, R_{\text{sigma}} = 0.0608$ ] |
| Data/restraints/parameters                    | 13595/3/1010                                                   |
| Goodness-of-fit on $F^2$                      | 1.043                                                          |
| Final R indexes [ $I \geq 2\sigma(I)$ ]       | $R_1 = 0.0315, wR_2 = 0.0829$                                  |
| Final R indexes [all data]                    | $R_1 = 0.0318, wR_2 = 0.0833$                                  |
| Largest diff. peak/hole / $e \text{\AA}^{-3}$ | 0.91/-0.58                                                     |

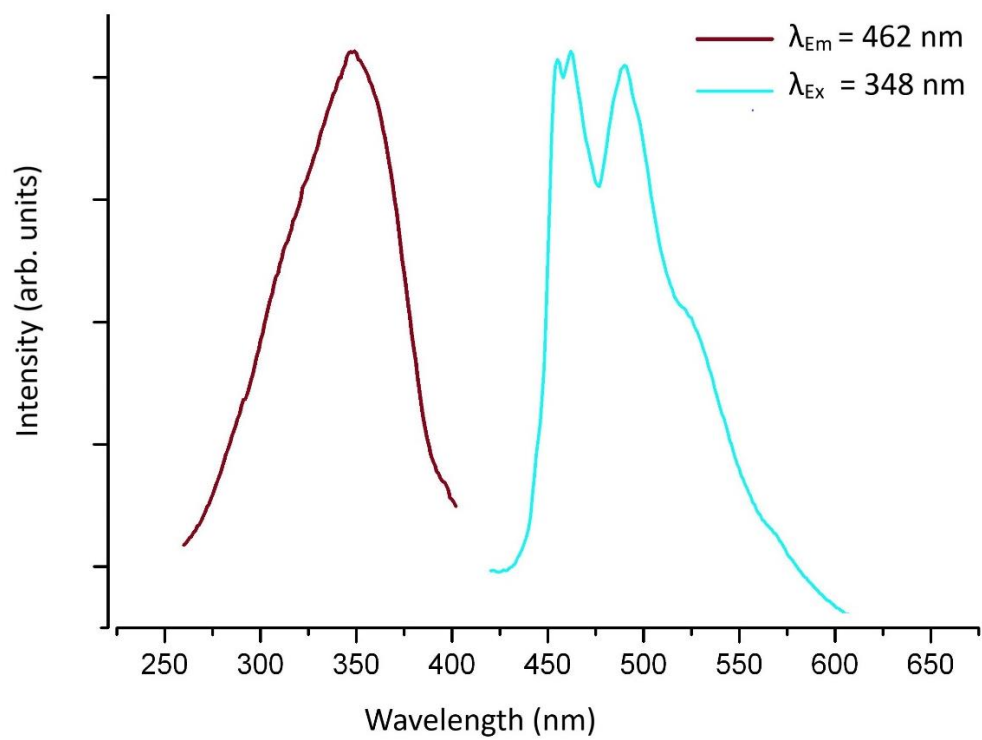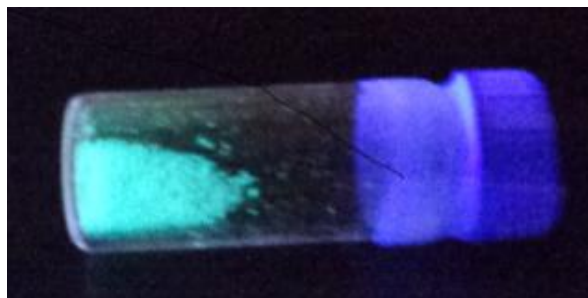

**Figure S7.** Room temperature emission and excitation spectra of crystalline solid samples of  $\{[3,5-(\text{CF}_3)_2\text{Pz}]\text{Ag}\}_4(1,10\text{-phen})_2$  showing emission bands at 455, 462, 490 nm.

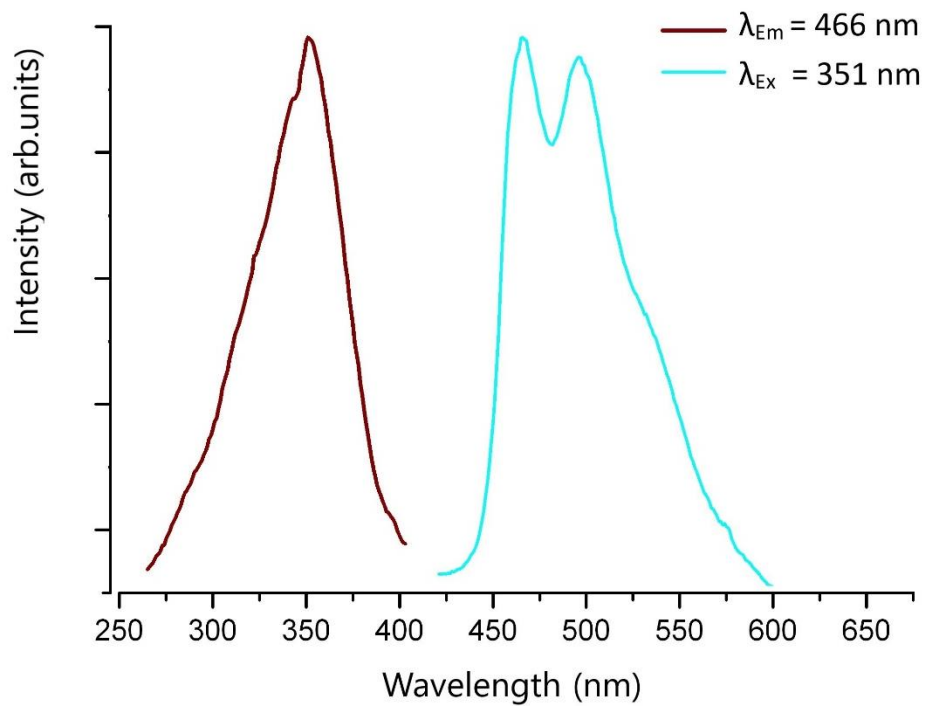

**Figure S8.** Room temperature emission and excitation spectra of crystalline solid samples of  $\{[4\text{-Cl-3,5-(CF}_3)_2\text{Pz]Ag}\}_4(1,10\text{-bipy})_2$  showing emission bands at 466 and 496 nm.

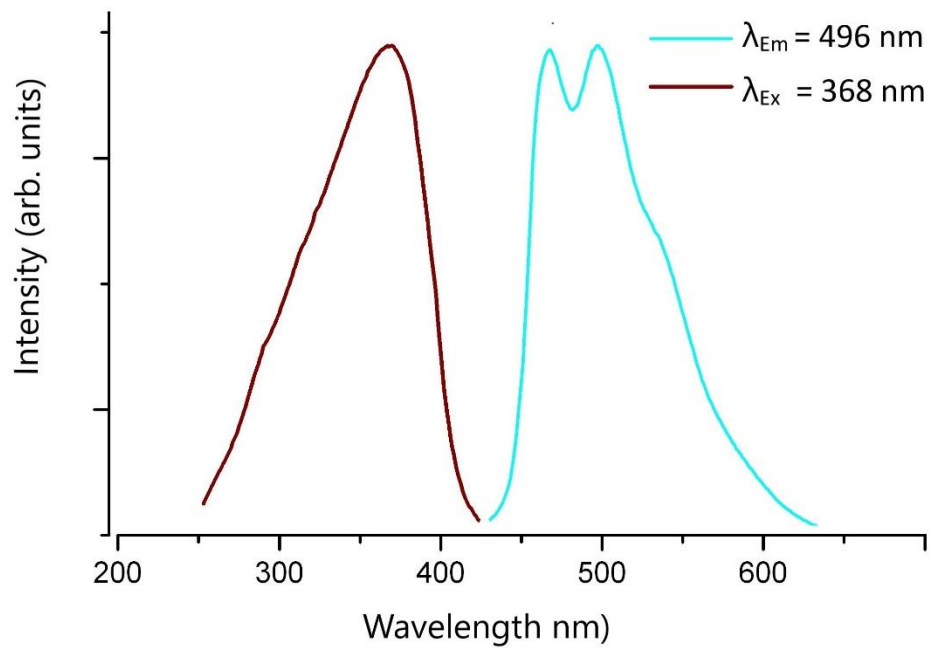

**Figure S9.** Room temperature emission and excitation spectra of crystalline solid samples of {[4-Br-3,5-(CF<sub>3</sub>)<sub>2</sub>Pz]Ag}<sub>4</sub>(1,10-phen)<sub>2</sub> showing emission bands at 468 and 496 nm.

## Computational Details

Geometry optimizations, energy decomposition analysis (EDA) and subsequent calculations were performed by using relativistic DFT methods employing the ADF code.<sup>1</sup> All-electron triple- $\xi$  Slater basis set plus the double-polarization (STO-TZ2P) basis set in conjunction with the Becke-Perdew (BP86) functional were employed, within the generalized gradient approximation (GGA), with London-type dispersion interactions accounted by the pair-wise Grimme approach (BP86-D3).<sup>2</sup> Relativistic effects were taken into account by ZORA formalism.<sup>3</sup> Electronic excitations were calculated at the Time-Dependent DFT approach, by using the long-range corrected LB94 functional.

## References

1. te Velde, G.; Bickelhaupt, F. M.; Baerends, E. J.; Fonseca Guerra, C.; van Gisbergen, S. J. A.; Snijders, J. G.; Ziegler, T., Chemistry with ADF. *Journal of Computational Chemistry* **2001**, *22*, 931-967.
2. Ehrlich, S.; Moellmann, J.; Grimme, S., Dispersion-Corrected Density Functional Theory for Aromatic Interactions in Complex Systems. *Accounts of Chemical Research* 2013, *46*, 916-926.
3. Faas, S.; Snijders, J. G.; van Lenthe, J. H.; van Lenthe, E.; Baerends, E. J., The ZORA formalism applied to the Dirac-Fock equation. *Chemical Physical Letters* **1995**, *246*, 632-640.

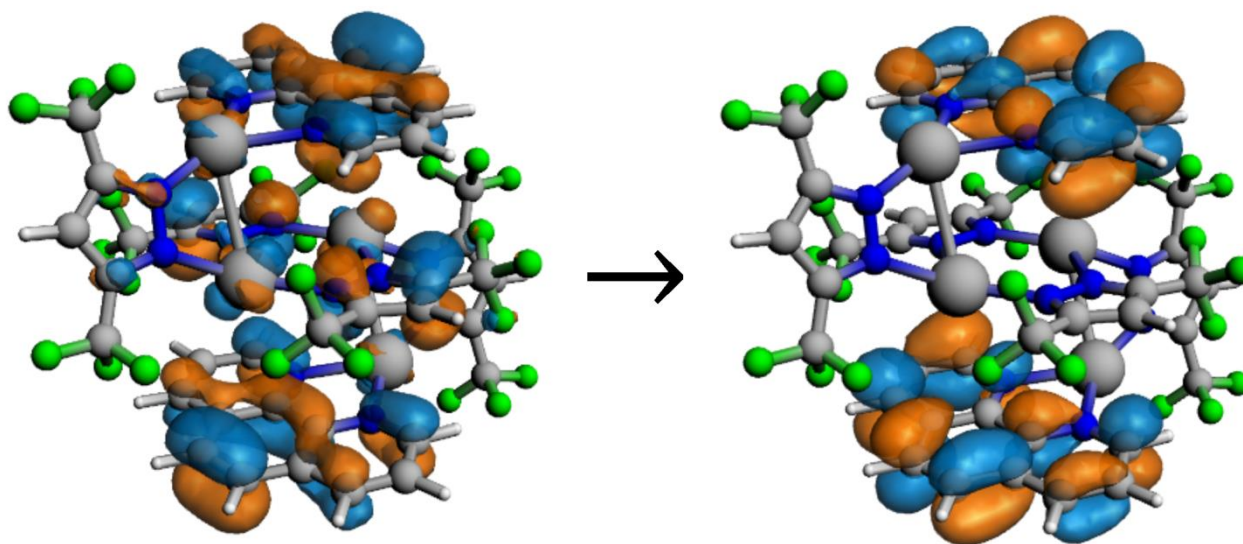

**Figure S10.** Relevant orbitals for the excitation transition, given for  $\{[3,5-(\text{CF}_3)_2\text{Pz}]\text{Ag}\}_4(1,10\text{-phen})_2$  (**5**) as a representative case. Showing a  $\pi \rightarrow \pi^*$  phenanthroline based transition.
